# Supplementary material for: Transcriptomics unravels molecular players shaping dorsal lip hypertrophy in the vacuum cleaner cichlid, Gnathochromis permaxillaris
Source: BMC Genomics. 2021 Jul 5;22:506. doi: 10.1186/s12864-021-07775-z (PMC8256507; doi:10.1186/s12864-021-07775-z)
Supplement: Supplementary file 3 — Additional file 2: Table S2. qPCR primers for candidate reference and target genes. [file 12864_2021_7775_MOESM2_ESM.xlsx]

## Sheet: Table S2_qPCR primers
	qPCR Primer sequences and information about candidate reference genes.
	Symbol	Primer Sequence (5’- 3’)		Product Size (bp)	Efficiency (E %)	R2 *	Melting Temperature (°C)
	h3f3	Forward	CTGCTGGGGGGACTCTGG	91	93.7	0.992	79.44 ± 0.1
		Reverse	GGAGGCTGGCAGGACAGG
	luc7l	Forward	GAGGGAGATGAGGAGGGGG	184	94.3	0.995	86 ± 0.2
		Reverse	GCAAACTGATCTGCTGGACTGGAG
	pip4k2b	Forward	GACACCCCACATTAAAACGCTGAG	161	105.5	0.993	84.3 ± 0.3
		Reverse	CGTACCCTGAATCCCCAGCC
	prkci	Forward	GGATTGGCTCGTTGGTGAACTGG	102	105.5	0.998	80.3 ± 0.2
		Reverse	AGCTCCTGGAACATAAGCAGGTGG
	setd3	Forward	CCGTATCCTCTGTGATGACCCGTC	163	107.3	0.992	82.43 ± 0.1
		Reverse	TGCAGTGCCACACATTCGCA
	snrnp70	Forward	CTCCAGCACTAACCAGCAGCT	178	108.1	0.995	85.4 ± 0.2
		Reverse	GCATGAGAGAGACATGCACTGTGAG
	ss18	Forward	CTCTCCTCCCTGCTCCGC	121	93.8	0.996	82.1 ± 0.2
		Reverse	CCGCTGACCATACCCTCAGAG
	trir	Forward	GAAGTGCTTTGCTGGTGGGG	80	96.3	0.993	80.29 ± 0.3
		Reverse	CTGATAGTACAGGAGGCGAGGATTGG
	ubxn4	Forward	GATGAAAAGGCTGCTAAGCTGGCG	120	97.2	0.996	80.54 ± 0.1
		Reverse	GTCTGGGAGGCGGAACTGG
	vasp	Forward	CCTGGGCTACATGAGAGGGT	194	110.6	0.991	85.9 ± 0.3
		Reverse	AGGAGATCTTGGAGGAAGTGCGG
	(*) R2, correlation coefficient of the slope of the standard curve.
	qPCR Primer sequences and information about candidate target genes.
	Symbol	Primer Sequence (5’- 3’)		Product Size (bp)	Efficiency (E %)	R2 *	Melting Temperature (°C)
	apoda	Forward	CCATCTCCCCATGAACTGTTTAAGGC	104	107.4	0.997	80 ± 0.2
		Reverse	CACTCACCCTCCCCATCATCAG
	fhl2	Forward	CTGCTCCCTCAGTCTGCCAC	146	108.6	0.997	82.56 ± 0.1
		Reverse	CCTCTCGCAGAACATACTTCTTCCCA
	foxf1	Forward	CCCACACATTCACTAGACCAACCA	85	98.3	0.999	77.4 ± 0.2
		Reverse	GGGAATGGTACCGAGGAATACCTTG
	foxp1	Forward	F_GGGGCTGTGTGGACAGTGG	126	89.5	0.996	85.4 ± 0.2
		Reverse	R_GGCAGCAGAGAGGGTCGG
	gimap8	Forward	AGACAGAGGTCTGCTTTATCCTCAGAG	106	105.5	0.998	80.2 ± 0.1
		Reverse	TGAGGGTCGTTCTGCTGGG
	igf2b	Forward	GTGTGGGGGAGAACTGGTGG	102	97.2	0.996	80.1 ± 0.2
		Reverse	GTCTGGGGGCGTCGGTTG
	lama5	Forward	AGTATCGGAGGACGCTGTGTGTG	84	99	0.998	78.9 ± 0.2
		Reverse	GCACTGCAACTTGTAGGGGTTG
	rasal3	Forward	GAGAGAGTGAATGTGCTGGAGGAG	130	103	0.995	82.3 ± 0.2
		Reverse	GGGTTCAGGTGGTGTTGAGTGG
	tcf12	Forward	CCCCCTCCTCCCCAAATTATGAG	110	91.3	0.993	82.1 ± 0.2
		Reverse	GCCCACTGCGTGGTTCC
	trim37	Forward	TGCTTAGAGGTGGAGGGCTG	96	107.9	0.995	79.3 ± 0.1
		Reverse	GATGGGAGGAGCAGAGGGAG
	(*) R2, correlation coefficient of the slope of the standard curve.
